# Supplementary material for: Depression and diabetes distress in adults with type 2 diabetes: results from the Australian National Diabetes Audit (ANDA) 2016
Source: PubMed Central journal article supplement (PMC5959930; doi:10.1038/s41598-018-26138-5), 2018-05-18
Supplement: 41598_2018_26138_MOESM1_ESM.pdf [file 41598_2018_26138_MOESM1_ESM.pdf]

## **Supplementary appendix - Depression and diabetes distress in adults with type 2 diabetes: results from the Australian National Diabetes Audit (ANDA) 2016**

Natalie Nanayakkara<sup>1,2</sup>, Anthony Pease<sup>1,2</sup>, Sanjeeva Ranasinha<sup>1</sup>, Natalie Wischer<sup>1,3</sup>, Sofianos Andrikopoulos<sup>4</sup>, Jane Speight<sup>5,6,7</sup>, Barbora de Courten<sup>2</sup>, Sophia Zoungas<sup>1,2,4</sup>

### **Affiliations**

1. School Public Health and Preventive Medicine, Monash University, VIC 3168, Australia
2. Diabetes and Vascular Medicine Unit, Monash Health, Clayton, VIC, 3168 Australia
3. National Association Diabetes Centres, Sydney, NSW 2000 Australia
4. The University of Melbourne, Department of Medicine, Heidelberg, VIC 3168 Australia
5. Deakin University, School of Psychology, Geelong, Victoria, Australia,
6. The Australian Centre for Behavioural Research in Diabetes, Diabetes Victoria, Melbourne, Australia
7. AHP Research, Hornchurch, UK
8. The George Institute for Global Health, Camperdown, NSW 2050 Australia

### **Corresponding Author**

Professor Sophia Zoungas

School of Public Health and Preventive Medicine, Monash University

Tel.: +61 3 9594 7500; Fax: +61 3 9594 7554

E-mail: [sophia.zoungas@monash.edu](mailto:sophia.zoungas@monash.edu)

Supplementary Appendix

**Supplementary Table 1: Participating diabetes centres by state or territory**

| State/Territory              | Participating centres<br>(n) | Adults with T2DM<br>(n) |
|------------------------------|------------------------------|-------------------------|
| Australian Capital Territory | 1                            | 78                      |
| New South Wales              | 10                           | 480                     |
| Queensland                   | 10                           | 699                     |
| South Australia              | 2                            | 111                     |
| Tasmania                     | 3                            | 129                     |
| Victoria                     | 22                           | 969                     |
| Western Australia            | 2                            | 86                      |
| Total                        | 50                           | 2552                    |

## Supplementary Table 2 Factors associated with the sub categories of diabetes distress

Multivariable analyses, variables included if  $p < 0.1$  on univariable analyses, age and gender always included

| Emotional distress            | Odds Ratio | [95% Conf. Interval] | P>z    |
|-------------------------------|------------|----------------------|--------|
| Age                           | 0.98       | 0.97 0.99            | 0.001  |
| Sex                           | 1.27       | 0.96 1.69            | 0.098  |
| Insulin                       | 1.73       | 1.23 2.43            | 0.001  |
| Current_Smoking               | 0.76       | 0.51 1.13            | 0.181  |
| Interpret                     | 2.57       | 1.06 6.20            | 0.036  |
| Medications_Forget            | 0.97       | 0.71 1.32            | 0.837  |
| Diet_Difficulty               | 2.34       | 1.73 3.15            | <0.001 |
| HbA1c Percent                 | 1.14       | 1.05 1.22            | 0.001  |
| Sufficient_physical_activity  | 1.12       | 0.82 1.54            | 0.482  |
| BCD_depression_likely         | 3.04       | 2.26 4.09            | <0.001 |
| antidep_and/or_counselling    | 1.43       | 1.06 1.92            | 0.019  |
| DiabetesSpecialist            | 1.26       | 0.91 1.73            | 0.167  |
| Checks_glucose                |            |                      |        |
| Yes                           | 0.75       | 0.55 1.02            | 0.068  |
| Unsure of recommended testing | 0.68       | 0.35 1.32            | 0.251  |
| Own Health State Rating       | 0.97       | 0.96 0.98            | <0.001 |

| Physician-related distress   | Odds Ratio | [95% Conf. Interval] | P>z    |
|------------------------------|------------|----------------------|--------|
| Age                          | 0.98       | 0.96 0.99            | 0.012  |
| Sex                          | 1.53       | 0.97 2.41            | 0.07   |
| Insulin                      | 1.46       | 0.88 2.40            | 0.141  |
| Medications_Forget           | 1.44       | 0.90 2.32            | 0.131  |
| Diet_Difficulty              | 1.09       | 0.67 1.76            | 0.733  |
| Sufficient_physical_activity | 0.53       | 0.30 0.96            | 0.037  |
| BCD_depression_likely        | 3.50       | 2.10 5.85            | <0.001 |
| Own Health State Rating      | 0.98       | 0.97 0.99            | 0.004  |

| Regimen-related distress     | Odds Ratio | [95% Conf. Interval] | P>z    |
|------------------------------|------------|----------------------|--------|
| Age                          | 0.98       | 0.97 0.99            | 0.003  |
| Sex                          | 1.20       | 0.88 1.63            | 0.246  |
| Insulin                      | 1.10       | 0.78 1.53            | 0.590  |
| Current_Smoking              | 0.84       | 0.56 1.26            | 0.402  |
| Interpret                    | 4.55       | 1.36 15.18           | 0.014  |
| Medications_Forget           | 1.70       | 1.24 2.32            | 0.001  |
| Diet_Difficulty              | 3.00       | 2.15 4.17            | <0.001 |
| HbA1c Percent                | 1.17       | 1.09 1.27            | <0.001 |
| Sufficient_physical_activity | 0.77       | 0.54 1.10            | 0.148  |
| BCD_depression_likely        | 2.96       | 2.15 4.07            | <0.001 |
| antidep_and/or_counselling   | 1.57       | 1.14 2.16            | 0.005  |
| Check_glucose                |            |                      |        |

|                               |      |      |      |        |
|-------------------------------|------|------|------|--------|
| Yes                           | 0.39 | 0.28 | 0.54 | <0.001 |
| Unsure of recommended testing | 0.59 | 0.31 | 1.12 | 0.108  |
| Own Health State Rating       | 0.98 | 0.97 | 0.98 | <0.001 |

---

| Interpersonal distress        | Odds Ratio | [95% Conf. | Interval] | P>z    |
|-------------------------------|------------|------------|-----------|--------|
| Age                           | 0.98       | 0.97       | 1.00      | 0.009  |
| Sex                           | 1.58       | 1.11       | 2.26      | 0.011  |
| Insulin                       | 1.72       | 1.13       | 2.62      | 0.011  |
| Current_Smoking               | 0.84       | 0.52       | 1.35      | 0.459  |
| Medications_Forget            | 1.26       | 0.87       | 1.83      | 0.224  |
| Diet_Difficulty               | 2.32       | 1.58       | 3.40      | <0.001 |
| HbA1c Percent                 | 1.13       | 1.03       | 1.23      | 0.007  |
| BCD_depression_likely         | 2.93       | 2.00       | 4.30      | <0.001 |
| antidep_and/or_counselling    | 1.51       | 1.05       | 2.17      | 0.027  |
| Check_glucose                 |            |            |           |        |
| Yes                           | 0.93       | 0.63       | 1.36      | 0.700  |
| Unsure of recommended testing | 0.45       | 0.17       | 1.21      | 0.116  |
| Own Health State Rating       | 0.97       | 0.96       | 0.98      | <0.001 |

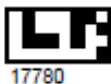

17780

## ANDA-AQSMA 2016

Australian National Diabetes Audit - Australian Quality Self Management Audit

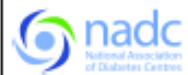

## Section 1. Patient Demographics

|                          |                                                                    |                   |                                                                              |                                       |                                                          |
|--------------------------|--------------------------------------------------------------------|-------------------|------------------------------------------------------------------------------|---------------------------------------|----------------------------------------------------------|
| Medical Record No.       | <input type="text"/>                                               | Centre ID         | <input type="text"/>                                                         | Site Staff Identifier                 | <input type="text"/>                                     |
| 1.1 Date of birth        | <input type="text"/> / <input type="text"/> / <input type="text"/> | 1.2 Sex           | <input type="checkbox"/> Male <input type="checkbox"/> Female <b>#FEMALE</b> | → 1.2.1 Currently pregnant            | <input type="checkbox"/> No <input type="checkbox"/> Yes |
| 1.3 Date of visit        | <input type="text"/> / <input type="text"/> / <input type="text"/> | 1.4 Initial visit | <input type="checkbox"/> No <input type="checkbox"/> Yes                     | 1.5 Aboriginal/Torres Strait Islander | <input type="checkbox"/> No <input type="checkbox"/> Yes |
| 1.6 Interpreter required | <input type="checkbox"/> No <input type="checkbox"/> Yes           | 1.7 DVA patient   | <input type="checkbox"/> No <input type="checkbox"/> Yes                     | 1.8 NDSS member                       | <input type="checkbox"/> No <input type="checkbox"/> Yes |
| 1.9 Country of birth     | <input type="text"/>                                               |                   |                                                                              |                                       |                                                          |

## Section 2. Diabetes Type &amp; Management &amp; Lifestyle Issues

|                                                                    |                                                                                                                                                                               |                                                                                                                                            |                                                                                                                                                                 |
|--------------------------------------------------------------------|-------------------------------------------------------------------------------------------------------------------------------------------------------------------------------|--------------------------------------------------------------------------------------------------------------------------------------------|-----------------------------------------------------------------------------------------------------------------------------------------------------------------|
| 2.1 Year of diagnosis                                              | <input type="text"/>                                                                                                                                                          | 2.2 Type of diabetes                                                                                                                       | <input type="checkbox"/> Type 1 <input type="checkbox"/> Type 2 <input type="checkbox"/> GDM <input type="checkbox"/> Don't Know <input type="checkbox"/> Other |
| 2.3 Management method                                              | <input type="checkbox"/> Diet Only <input type="checkbox"/> Injectables <input type="checkbox"/> Insulin+Tablets+Injectables <input type="checkbox"/> Insulin <b>#INSULIN</b> | → 2.3.1 How long ago was insulin started?                                                                                                  | <input type="checkbox"/> <1yr <input type="checkbox"/> 1-5yrs <input type="checkbox"/> >5yrs                                                                    |
|                                                                    | <input type="checkbox"/> Tablets <input type="checkbox"/> Injectables+Tablets <input type="checkbox"/> Insulin+Tablets <input type="checkbox"/> Nil                           |                                                                                                                                            |                                                                                                                                                                 |
| 2.4 Physical activity sufficiency                                  | <input type="checkbox"/> Sufficient <input type="checkbox"/> Insufficient <input type="checkbox"/> Sedentary                                                                  |                                                                                                                                            |                                                                                                                                                                 |
| 2.5 Have you had a flu vaccination in the last 12 months?          | <input type="checkbox"/> No <input type="checkbox"/> Yes                                                                                                                      |                                                                                                                                            |                                                                                                                                                                 |
| 2.6 Have you had a pneumococcal vaccination in the last 12 months? | <input type="checkbox"/> No <input type="checkbox"/> Yes                                                                                                                      |                                                                                                                                            |                                                                                                                                                                 |
| 2.7 Smoking status                                                 | <input type="checkbox"/> Current smoker <b>#CURRENT</b> → 2.7.1 Have you tried to stop smoking? <input type="checkbox"/> No <input type="checkbox"/> Yes                      |                                                                                                                                            |                                                                                                                                                                 |
|                                                                    | <input type="checkbox"/> Past smoker <b>#PAST</b> → 2.7.2 Which of the following methods did you use?                                                                         | <input type="checkbox"/> Just stopped - no intervention <input type="checkbox"/> Nicotine replacement <input type="checkbox"/> Acupuncture |                                                                                                                                                                 |
|                                                                    | <input type="checkbox"/> Never smoked                                                                                                                                         | <input type="checkbox"/> Medication <input type="checkbox"/> Hypnosis <input type="checkbox"/> Other                                       |                                                                                                                                                                 |
| 2.8 Glycated Hb result                                             | <input type="text"/> % AND <input type="text"/> mmol/mol                                                                                                                      |                                                                                                                                            |                                                                                                                                                                 |

## Section 3. Medication Use

|                                                                                                                    |                          |                          |
|--------------------------------------------------------------------------------------------------------------------|--------------------------|--------------------------|
| 3.1 Do you ever forget to take your medications?                                                                   | No                       | Yes                      |
| <b>#YES</b> → 3.1.1 How many times per week?                                                                       | <input type="text"/>     | <input type="text"/>     |
| 3.2 Do you usually take all your medications?                                                                      | <input type="checkbox"/> | <input type="checkbox"/> |
| 3.3 Do you sometimes stop taking your medications when you feel better?                                            | <input type="checkbox"/> | <input type="checkbox"/> |
| 3.4 Do you sometimes stop taking your medications when you feel worse?                                             | <input type="checkbox"/> | <input type="checkbox"/> |
| 3.5 Are you using a complementary therapy or dietary supplement or over the counter (OTC) Rx?                      | <input type="checkbox"/> | <input type="checkbox"/> |
| <b>#YES</b> → 3.5.1 Have you told your doctor or educator about using complementary, dietary supplement or OTC Rx? | <input type="checkbox"/> | <input type="checkbox"/> |

## Section 5. Patient Self Care Practices

|                                                                              |                                                                                                                 |                          |
|------------------------------------------------------------------------------|-----------------------------------------------------------------------------------------------------------------|--------------------------|
| 5.1 Do you have difficulties following your recommended diet?                | No                                                                                                              | Yes                      |
| <b>#YES</b> → Do the following apply?                                        |                                                                                                                 |                          |
| 5.1.1 I don't have enough time to prepare healthy meals                      | <input type="checkbox"/>                                                                                        | <input type="checkbox"/> |
| 5.1.2 It costs too much to eat well                                          | <input type="checkbox"/>                                                                                        | <input type="checkbox"/> |
| 5.1.3 I don't know what foods are best to                                    | <input type="checkbox"/>                                                                                        | <input type="checkbox"/> |
| 5.1.4 I eat out a lot and find it hard to eat                                | <input type="checkbox"/>                                                                                        | <input type="checkbox"/> |
| 5.1.5 If Type 1 - it is too hard to count carbs/weigh food                   | <input type="checkbox"/>                                                                                        | <input type="checkbox"/> |
| 5.2 Do you check your blood glucose level as often as recommended?           | <input type="checkbox"/> No <input type="checkbox"/> Yes <input type="checkbox"/> Unsure of recommended testing |                          |
| 5.3 If you are on injectables or insulin, do you rotate your injection site? | <input type="checkbox"/> No <input type="checkbox"/> Yes                                                        |                          |

## Section 7. Quality of Life Assessment

## Part A: Self-assessment of health status

|                                     |                      |
|-------------------------------------|----------------------|
| 7.1 Own health state rating (0-100) | <input type="text"/> |
| 7.2 Screening Scale Q1              | <input type="text"/> |
| 7.3 Screening Scale Q2              | <input type="text"/> |

**#IF Q1 or Q2 is ≥ 3, complete Part B**

## Part B: Diabetes Distress Scale 17

|                                             |                                                          |
|---------------------------------------------|----------------------------------------------------------|
| 7.4 DDS 17 Questionnaire done               | <input type="checkbox"/> No <input type="checkbox"/> Yes |
| <b>#YES</b> → complete 7.4.1 - 7.4.5 below: |                                                          |
| 7.4.1 Total DDS 17 Score                    | <input type="text"/> - <input type="text"/>              |
| 7.4.2 Emotional Burden (A)                  | <input type="text"/> - <input type="text"/>              |
| 7.4.3 Physician-related distress (B)        | <input type="text"/> - <input type="text"/>              |
| 7.4.4 Regimen-related distress (C)          | <input type="text"/> - <input type="text"/>              |
| 7.4.5 Interpersonal distress (D)            | <input type="text"/> - <input type="text"/>              |

## Section 4. Health Professional Attendances

|                                                                      |                          |                          |                            |
|----------------------------------------------------------------------|--------------------------|--------------------------|----------------------------|
| Has the patient attended any of the following in the last 12 months? |                          |                          |                            |
|                                                                      | No                       | Yes                      |                            |
| 4.1 Podiatrist                                                       | <input type="checkbox"/> | <input type="checkbox"/> | 4.6 Diabetes Specialist    |
| 4.2 Diabetes Educator                                                | <input type="checkbox"/> | <input type="checkbox"/> | 4.7 Ophthalmologist        |
| 4.3 Dietitian                                                        | <input type="checkbox"/> | <input type="checkbox"/> | 4.8 Optometrist            |
| 4.4 Psychologist                                                     | <input type="checkbox"/> | <input type="checkbox"/> | 4.9 Dentist                |
| 4.5 Social Worker                                                    | <input type="checkbox"/> | <input type="checkbox"/> | 4.10 Exercise Physiologist |

## Section 6A. BCD

|                                                     |                          |                          |
|-----------------------------------------------------|--------------------------|--------------------------|
| Over the last couple of weeks has the patient been: |                          |                          |
|                                                     | No                       | Yes                      |
| 6A.1 Having restless or disturbed nights            | <input type="checkbox"/> | <input type="checkbox"/> |
| 6A.2 Feeling unhappy or depressed                   | <input type="checkbox"/> | <input type="checkbox"/> |
| 6A.3 Feeling unable to overcome difficulties        | <input type="checkbox"/> | <input type="checkbox"/> |
| 6A.4 Dissatisfied with their way of doing things    | <input type="checkbox"/> | <input type="checkbox"/> |

## Section 6B. Treatment

|                                            |                          |                          |
|--------------------------------------------|--------------------------|--------------------------|
|                                            | No                       | Yes                      |
| 6B.1 Is the patient taking antidepressants | <input type="checkbox"/> | <input type="checkbox"/> |
| 6B.2 Psych. treatment/counselling - past   | <input type="checkbox"/> | <input type="checkbox"/> |
| 6B.3 Psych. treatment/counselling - now    | <input type="checkbox"/> | <input type="checkbox"/> |
